# Supplementary material for: Gene expression changes in a zebrafish model of drug dependency suggest conservation of neuro-adaptation pathways
Source: Oxford University Press journal article supplement (doi:10.1242/jeb.014399), 2008-05-04
Supplement: jeb014399supptables1.pdf [file jeb014399supptables1.pdf]

Table S1. Genes showing significant 1.5-fold or greater changes in expression in both ethanol-treated and nicotine-treated animals compared with control animals

| Biological process term                                            | Probe set ID    | Gene symbol               | Gene title                                     | Molecular function term                                                                                                                                   | Cellular component term                                                            |
|--------------------------------------------------------------------|-----------------|---------------------------|------------------------------------------------|-----------------------------------------------------------------------------------------------------------------------------------------------------------|------------------------------------------------------------------------------------|
| <b>Protein modification/<br/>ubiquitination</b>                    |                 |                           |                                                |                                                                                                                                                           |                                                                                    |
| Protein modification<br>process<br>Ubiquitin cycle                 | Dr10525.1.S1_at | hectd1                    | HECT domain containing 1                       | Ubiquitin-protein ligase<br>activity<br>binding<br>transferase activity<br>ligase activity                                                                | Intracellular                                                                      |
| Protein amino acid<br>glycosylation                                | Dr11084.1.A1_at | zgc:76904                 | zgc:76904                                      | Galactosyltransferase<br>activity                                                                                                                         | Membrane                                                                           |
| Ubiquitin cycle<br>Zinc ion transport                              | Dr11667.1.S1_at | zgc:55389                 | zgc:55389                                      | Protein binding<br>zinc ion binding<br>ligase activity<br>metal ion binding                                                                               |                                                                                    |
| Proteolysis                                                        | Dr12473.1.A1_at | npepps                    | aminopeptidase puromycin sensitive             | Membrane alanyl<br>aminopeptidase activity                                                                                                                |                                                                                    |
| Ubiquitin-dependent<br>protein catabolic<br>process                | Dr15777.1.A1_at | zgc:92791                 | zgc:92791                                      | Endopeptidase activity<br>threonine<br>endopeptidase activity<br>endopeptidase inhibitor<br>activity<br>peptidase activity<br>hydrolase activity          | Cytosol proteasome<br>core complex ( <i>sensu</i><br>Eukaryota) protein<br>complex |
| Ubiquinone<br>biosynthetic process<br>protein metabolic<br>process | Dr19634.1.S1_at | LOC559504                 | Hypothetical LOC559504                         | Oxidoreductase activity<br>transition metal ion<br>binding                                                                                                |                                                                                    |
| Proteolysis                                                        | Dr24341.1.S1_at | lgmn                      | legumain                                       | Legumain activity<br>cysteine-type<br>endopeptidase activity                                                                                              |                                                                                    |
| Protein folding                                                    | Dr26406.1.S1_at | zgc:110686                | zgc:110686                                     | Protein binding<br>unfolded protein binding                                                                                                               | Prefoldin complex                                                                  |
| Protein modification<br>process<br>Ubiquitin cycle                 | Dr2897.1.S1_at  | LOC100001969<br>zgc:56340 | zgc:56340<br>Hypothetical protein LOC100001969 | Ubiquitin-protein ligase<br>activity<br>ligase activity<br>small conjugating<br>protein ligase activity                                                   |                                                                                    |
| Ubiquitin cycle<br>Zinc ion transport                              | Dr3405.1.S1_at  | syvn1                     | synovial apoptosis inhibitor 1, synoviolin     | Protein binding<br>zinc ion binding<br>ligase activity<br>metal ion binding                                                                               | Endoplasmic<br>reticulum<br>membrane<br>integral to<br>membrane                    |
| Protein ubiquitination                                             | Dr3564.1.S1_at  | prp19                     | PRP19/PSO4 homolog ( <i>S. cerevisiae</i> )    | Ubiquitin-protein ligase<br>activity                                                                                                                      | Ubiquitin ligase<br>complex                                                        |
| Ubiquitin cycle                                                    | Dr8165.1.S1_at  | fbxw4                     | F-box and WD-40 domain protein 4               |                                                                                                                                                           | Nucleus                                                                            |
| <b>Transcription/<br/>translation</b>                              |                 |                           |                                                |                                                                                                                                                           |                                                                                    |
| mRNA processing<br>RNA splicing                                    | Dr1062.1.A1_at  | ddx46                     | DEAD (Asp-Glu-Ala-Asp) box polypeptide<br>46   | Nucleotide binding<br>nucleic acid binding<br>RNA binding<br>Helicase activity<br>ATP binding<br>ATP-dependent helicase<br>activity<br>hydrolase activity | Nucleus                                                                            |
| Regulation of<br>transcription, DNA-<br>dependent                  | Dr11222.1.A1_at | sox5                      | SRY-box containing gene 5                      | DNA binding                                                                                                                                               |                                                                                    |

|                                                                                                                                                                     |                 |                    |                                                                    |                                                                                                                                                                                                                                                                                                                                            |                                                                            |
|---------------------------------------------------------------------------------------------------------------------------------------------------------------------|-----------------|--------------------|--------------------------------------------------------------------|--------------------------------------------------------------------------------------------------------------------------------------------------------------------------------------------------------------------------------------------------------------------------------------------------------------------------------------------|----------------------------------------------------------------------------|
| Transcription<br>RNA elongation<br>regulation of<br>transcription, DNA-<br>dependent<br>ATP synthesis coupled<br>proton transport<br>regulation of<br>transcription | Dr11529.1.S1_at | tcea1              | transcription elongation factor A (SII), 1                         | DNA binding<br>RNA polymerase II<br>transcription factor<br>activity<br>translation elongation<br>factor activity<br>zinc ion binding<br>transcription regulator<br>activity<br>hydrogen ion<br>transporting ATP<br>synthase activity,<br>rotational mechanism<br>hydrogen ion<br>transporting ATPase<br>activity, rotational<br>mechanism | Nucleus<br>membrane<br>proton-transporting<br>two-sector ATPase<br>complex |
| Regulation of<br>transcription, DNA-<br>dependent<br>zinc ion transport                                                                                             | Dr1216.1.A1_at  | atf7b              | activating transcription factor 7b                                 | Nucleic acid binding<br>DNA binding<br>transcription factor<br>activity<br>zinc ion binding<br>sequence-specific DNA<br>binding<br>metal ion binding<br>protein dimerization<br>activity                                                                                                                                                   | Intracellular<br>nucleus                                                   |
| Transcription<br>transcription<br>termination<br>regulation of<br>transcription, DNA-<br>dependent<br>transcription<br>antitermination                              | Dr1403.1.S1_at  | mef2d              | myocyte enhancer factor 2d                                         | DNA binding<br>transcription factor<br>activity<br>sequence-specific DNA<br>binding                                                                                                                                                                                                                                                        | Nucleus                                                                    |
| DNA metabolic<br>process<br>chromosome<br>organization and<br>biogenesis                                                                                            | Dr1653.1.S1_at  | smc4               | structural maintenance of chromosomes 4                            | Protein binding<br>ATP binding                                                                                                                                                                                                                                                                                                             | Chromosome<br>membrane                                                     |
| Regulation of<br>transcription, DNA-<br>dependent                                                                                                                   | Dr20806.1.S1_at | ing3               | inhibitor of growth family, member 3                               | Protein binding<br>zinc ion binding                                                                                                                                                                                                                                                                                                        |                                                                            |
| Transcription                                                                                                                                                       | Dr22506.1.A1_at | crsp7              | cofactor required for Sp1 transcriptional<br>activation, subunit 7 |                                                                                                                                                                                                                                                                                                                                            | Nucleus                                                                    |
| Translation                                                                                                                                                         | Dr284.3.S1_a_at | rpl6               | ribosomal protein L6                                               | Structural constituent of<br>ribosome                                                                                                                                                                                                                                                                                                      | Intracellular<br>ribosome<br>ribonucleoprotein<br>complex                  |
| Translation<br>translational initiation                                                                                                                             | Dr4943.1.S1_at  | eif1b              | eukaryotic translation initiation factor 1B                        | Translation initiation<br>factor activity                                                                                                                                                                                                                                                                                                  |                                                                            |
| Translation                                                                                                                                                         | Dr8.2.S1_at     | LOC798360<br>rpl5b | ribosomal protein L5b<br>similar to ribosomal protein L5b          | Structural constituent of<br>ribosome<br>5S rRNA binding                                                                                                                                                                                                                                                                                   | Intracellular<br>ribosome                                                  |
| Protein amino acid<br>phosphorylation                                                                                                                               | Dr811.1.S1_at   | rps6kal            | ribosomal protein S6 kinase, like                                  | Nucleotide binding<br>magnesium ion binding<br>protein kinase activity<br>protein serine/threonine<br>kinase activity<br>serine-type<br>endopeptidase Inhibitor<br>activity<br>ATP binding<br>kinase activity<br>transferase activity<br>metal ion binding                                                                                 |                                                                            |
|                                                                                                                                                                     | Dr9079.1.S1_at  | brd8               | bromodomain containing 8                                           |                                                                                                                                                                                                                                                                                                                                            |                                                                            |

|                                                                                                                                                   |                   |           |                                                                                          |                                                                                                                                                                                              |                                                       |
|---------------------------------------------------------------------------------------------------------------------------------------------------|-------------------|-----------|------------------------------------------------------------------------------------------|----------------------------------------------------------------------------------------------------------------------------------------------------------------------------------------------|-------------------------------------------------------|
| Translation                                                                                                                                       | Dr9746.3.S1_at    | rpl19     | ribosomal protein L19                                                                    | Structural constituent of ribosome                                                                                                                                                           | Intracellular ribosome ribonucleoprotein complex      |
| <b>Neurotransmission/<br/>synaptic plasticity</b>                                                                                                 |                   |           |                                                                                          |                                                                                                                                                                                              |                                                       |
| Protein amino acid phosphorylation<br>cell adhesion<br>multicellular organismal development<br>nervous system development<br>cell differentiation | Dr12598.1.S1_at   | ncam2     | neural cell adhesion molecule 2                                                          | Vascular endothelial growth factor receptor activity<br>protein binding<br>ATP binding                                                                                                       | Membrane attack complex membrane                      |
|                                                                                                                                                   | Dr12849.2.A1_a_at |           | Similar to NMDA receptor 1                                                               |                                                                                                                                                                                              |                                                       |
|                                                                                                                                                   | Dr16098.1.S1_at   | hcrr2     | hypocretin (orexin) receptor 2                                                           |                                                                                                                                                                                              |                                                       |
|                                                                                                                                                   | Dr16352.1.A1_at   | LOC562471 | Similar to SLIT and NTRK-like family, member 5                                           |                                                                                                                                                                                              |                                                       |
| Protein amino acid phosphorylation<br>transmembrane receptor protein tyrosine kinase signaling pathway                                            | Dr17564.1.A1_at   | epha4b    | Eph receptor A4b                                                                         | Nucleotide binding<br>protein kinase activity<br>protein-tyrosine kinase activity<br>receptor activity<br>ephrin receptor activity<br>ATP binding<br>kinase activity<br>transferase activity | Membrane attack complex membrane integral to membrane |
| Ion transport                                                                                                                                     | Dr18279.1.S1_at   | gria2a    | glutamate receptor, ionotropic, AMPA 2a                                                  | Receptor activity<br>ionotropic glutamate receptor activity<br>ion channel activity<br>glutamate-gated ion channel activity                                                                  | Membrane                                              |
| Calcium ion transport<br>homophilic cell adhesion                                                                                                 | Dr21026.1.S1_at   | pcdh10a   | protocadherin 10a                                                                        | Calcium channel activity<br>calcium ion binding<br>calcium channel inhibitor activity                                                                                                        | Membrane                                              |
| Catecholamine metabolic process<br>lipid metabolic process<br>xenobiotic metabolic process<br>steroid metabolic process                           | Dr24258.1.S1_at   | sult1st2  | sulfotransferase family 1, cytosolic sulfotransferase 2                                  | Sulfotransferase activity<br>sulfotransferase activity<br>transferase activity                                                                                                               | Cytoplasm                                             |
|                                                                                                                                                   | Dr3199.1.A1_at    | LOC556181 | Similar to solute carrier family 1 (glial high affinity glutamate transporter), member 3 |                                                                                                                                                                                              |                                                       |
| Gamma-aminobutyric acid metabolic process                                                                                                         | Dr5312.1.S1_at    | abat      | 4-Aminobutyrate aminotransferase                                                         | Catalytic activity<br>4-aminobutyrate transaminase activity<br>transaminase activity<br>transferase activity<br>pyridoxal phosphate binding                                                  |                                                       |
| Transport<br>cell cycle<br>mitosis<br>multicellular organismal development<br>nervous system development<br>cell differentiation<br>cell division | Dr6616.1.S1_at    | pafah1b1b | platelet-activating factor acetylhydrolase, isoform 1b, alpha subunit b (LIS-1A)         |                                                                                                                                                                                              | Cytoskeleton microtubule                              |

**Synaptic plasticity/  
structural**

|                             |                 |           |                                               |                              |                                                                |
|-----------------------------|-----------------|-----------|-----------------------------------------------|------------------------------|----------------------------------------------------------------|
|                             | Dr14127.1.S1_at | gfap      | glial fibrillary acidic protein               | Structural molecule activity | Cytoplasm intermediate filament type III intermediate filament |
|                             | Dr16118.1.A1_at | LOC567833 | Similar to microtubule-associated protein tau |                              |                                                                |
| Cell adhesion               | Dr17585.1.S1_at | LOC569045 | Similar to MGC115547 protein                  | Structural molecule activity | Actin cytoskeleton                                             |
| Cell wall catabolic process | Dr19411.1.A1_at | zgc:86648 | Zgc:86648                                     | Tropomyosin binding          | Cytoskeleton                                                   |

**Signal transduction**

|                                                                                                                                   |                   |                   |                                                                                                   |                                                                                                                                                                                                                        |                                                   |
|-----------------------------------------------------------------------------------------------------------------------------------|-------------------|-------------------|---------------------------------------------------------------------------------------------------|------------------------------------------------------------------------------------------------------------------------------------------------------------------------------------------------------------------------|---------------------------------------------------|
| Protein amino acid phosphorylation                                                                                                | Dr12674.1.S1_at   | zgc:112307        | zgc:112307                                                                                        | Protein kinase activity<br>ATP binding                                                                                                                                                                                 |                                                   |
| Protein amino acid dephosphorylation                                                                                              | Dr15652.1.S1_at   | pp2cb             | protein phosphatase type 2C beta                                                                  | Magnesium ion binding<br>catalytic activity<br>phosphoprotein phosphatase activity<br>protein serine/threonine phosphatase activity<br>protein phosphatase type 2C activity<br>hydrolase activity<br>metal ion binding | Protein serine/threonine phosphatase complex      |
| Small GTPase mediated signal transduction                                                                                         | Dr16422.1.S1_at   | diras1            | DIRAS family, GTP-binding RAS-like 1                                                              | Nucleotide binding<br>GTP binding                                                                                                                                                                                      | Membrane attack complex<br>intracellular membrane |
| Protein transport regulation of GTPase activity                                                                                   | Dr18113.1.S1_at   | gdi1<br>LOC554985 | GDP dissociation inhibitor 1<br>similar to GDP dissociation inhibitor 1                           | Rab GDP-dissociation inhibitor activity                                                                                                                                                                                |                                                   |
| Calcium ion transport                                                                                                             | Dr19079.1.S1_at   | zgc:92169         | calcineurin B                                                                                     | Calcium channel activity<br>calcium ion binding<br>calcium channel inhibitor activity                                                                                                                                  |                                                   |
| Protein amino acid phosphorylation                                                                                                | Dr19161.2.S1_at   | zgc:153415        | zgc:153415                                                                                        | Protein kinase activity<br>protein serine/threonine kinase activity<br>ATP binding                                                                                                                                     |                                                   |
| Protein amino acid dephosphorylation                                                                                              | Dr20956.1.S1_at   | pp2ca2            | protein phosphatase type 2C alpha 2                                                               | Magnesium ion binding<br>catalytic activity<br>phosphoprotein phosphatase activity<br>protein serine/threonine phosphatase activity<br>protein phosphatase type 2C activity<br>hydrolase activity<br>metal ion binding | Protein serine/threonine phosphatase complex      |
| Small GTPase mediated signal transduction                                                                                         | Dr23643.1.A1_s_at | arl11             | ADP-ribosylation factor-like 11                                                                   | Nucleotide binding<br>GTP binding                                                                                                                                                                                      | Intracellular                                     |
| Activation of MAPKKK activity<br>central nervous system development<br>neural crest cell development<br>embryonic camera-type eye | Dr2414.1.S2_at    | smarca4           | SWI/SNF related, matrix associated, actin dependent regulator of chromatin, subfamily a, member 4 | Nucleic acid binding<br>DNA binding<br>helicase activity<br>ATP binding                                                                                                                                                |                                                   |

|                                                                                                                                                                                                                                                                |                 |                         |                                                                                                                                       |                                                                                  |                                                                                                                          |
|----------------------------------------------------------------------------------------------------------------------------------------------------------------------------------------------------------------------------------------------------------------|-----------------|-------------------------|---------------------------------------------------------------------------------------------------------------------------------------|----------------------------------------------------------------------------------|--------------------------------------------------------------------------------------------------------------------------|
| morphogenesis                                                                                                                                                                                                                                                  |                 |                         |                                                                                                                                       |                                                                                  |                                                                                                                          |
| Negative regulation of signal transduction                                                                                                                                                                                                                     | Dr3391.1.A1_at  | zgc:92099               | zgc:92099                                                                                                                             |                                                                                  | Membrane attack complex<br>signal recognition particle, endoplasmic reticulum targeting<br>membrane integral to membrane |
|                                                                                                                                                                                                                                                                | Dr7417.1.S1_at  | sh3bp5                  | SH3-domain binding protein 5 (BTK-associated)                                                                                         |                                                                                  |                                                                                                                          |
| <b>Cell cycle/<br/>apoptosis</b>                                                                                                                                                                                                                               |                 |                         |                                                                                                                                       |                                                                                  |                                                                                                                          |
| Regulation of progression through cell cycle                                                                                                                                                                                                                   | Dr17362.1.A1_at | zgc:153047              | zgc:153047                                                                                                                            |                                                                                  |                                                                                                                          |
| Cell cycle                                                                                                                                                                                                                                                     | Dr17497.1.A1_at | cul1a                   | Cullin 1a                                                                                                                             |                                                                                  |                                                                                                                          |
| Regulation of progression through cell cycle<br>regulation of cyclin-dependent protein kinase activity<br>regulation of transcription                                                                                                                          | Dr18505.1.S1_at | wu:fi75b02              | wu:fi75b02                                                                                                                            | Protein kinase binding                                                           |                                                                                                                          |
| Apoptosis                                                                                                                                                                                                                                                      | Dr2992.1.A1_at  | opa1                    | optic atrophy 1 (human)                                                                                                               | Nucleotide binding<br>GTPase activity<br>GTP binding                             | Membrane attack complex<br>mitochondrion<br>membrane integral to membrane                                                |
| Apoptosis                                                                                                                                                                                                                                                      | Dr3900.1.A1_at  | LOC100004578<br>tax1bp1 | Tax1 (human T-cell leukemia virus type I) binding protein 1<br>similar to Tax1 (human T-cell leukemia virus type I) binding protein 1 |                                                                                  |                                                                                                                          |
| Negative regulation of apoptosis<br>Double-strand break repair via non-homologous end joining<br>DNA recombination<br>response to ionizing radiation<br>DNA damage response, signal transduction by p53 class mediator<br>resulting in induction of apoptosis. | Dr18239.2.A1_at | xrcc5                   | Double strand repair complementing defective repair in Chinese hamster cells 5                                                        | DNA binding                                                                      | Nucleus                                                                                                                  |
| <b>Steroid/lipid transport</b>                                                                                                                                                                                                                                 |                 |                         |                                                                                                                                       |                                                                                  |                                                                                                                          |
| Transport<br>lipid transport<br>steroid metabolic process                                                                                                                                                                                                      | Dr11569.1.S1_at | osbpl2                  | oxysterol binding protein-like 2                                                                                                      |                                                                                  |                                                                                                                          |
| Lipid transport                                                                                                                                                                                                                                                | Dr4188.2.S1_at  | LOC791876<br>rtn1a      | reticulon 1a<br>Hypothetical protein LOC791876                                                                                        | Lipid transporter activity                                                       | Endoplasmic reticulum                                                                                                    |
|                                                                                                                                                                                                                                                                | Dr6972.1.S1_at  | lrpap1                  | low density lipoprotein receptor-related protein associated protein 1                                                                 | Receptor activity<br>heparin binding<br>low-density lipoprotein receptor binding | Endoplasmic reticulum                                                                                                    |

**Ion/protein transport**

|                                                                                                                                                      |                 |                |                                                    |                                                                                                                                                                                                                                             |                                                                                                                       |
|------------------------------------------------------------------------------------------------------------------------------------------------------|-----------------|----------------|----------------------------------------------------|---------------------------------------------------------------------------------------------------------------------------------------------------------------------------------------------------------------------------------------------|-----------------------------------------------------------------------------------------------------------------------|
| Phosphate transport<br>collagen catabolic<br>process                                                                                                 | Dr14041.1.S1_at | c1qc           | complement component 1, q<br>subcomponent, C chain |                                                                                                                                                                                                                                             | Cytoplasm                                                                                                             |
| Zinc ion transport                                                                                                                                   | Dr14198.1.S1_at | zgc:101840     | zgc:101840                                         | Zinc ion binding<br>metal ion binding                                                                                                                                                                                                       |                                                                                                                       |
| Transport<br>iron ion transport<br>iron ion homeostasis<br>embryonic<br>hemopoiesis<br>erythrocyte maturation<br>mitochondrial iron ion<br>transport | Dr15077.2.A1_at | slc25a37       | solute carrier family 25, member 37                | Iron ion transporter<br>activity<br>binding<br>iron ion binding                                                                                                                                                                             | Membrane attack<br>complex<br>mitochondrion<br>mitochondrial inner<br>membrane<br>membrane<br>integral to<br>membrane |
| Protein import into<br>nucleus, docking<br>intracellular protein<br>transport                                                                        | Dr19552.1.S1_at | zgc:76878      | zgc:76878                                          | Binding<br>protein transporter<br>activity                                                                                                                                                                                                  | Nucleus<br>nuclear pore<br>cytoplasm                                                                                  |
| Transport<br>cation transport<br>calcium ion transport<br>metabolic process                                                                          | Dr3418.1.A1_at  | si:dkey-18o7.1 | si:dkey-18o7.1                                     | Nucleotide binding<br>magnesium ion binding<br>catalytic activity<br>calcium channel activity<br>calcium-transporting<br>ATPase activity<br>calcium ion binding<br>calmodulin binding<br>ATP binding<br>calcium ion transporter<br>activity | Membrane attack<br>complex<br>membrane<br>integral to<br>membrane                                                     |
|                                                                                                                                                      | Dr10295.1.A1_at |                |                                                    |                                                                                                                                                                                                                                             |                                                                                                                       |

**Metabolism**

|                                                     |                   |                                              |                                                                                                                                                     |                                                                                     |               |
|-----------------------------------------------------|-------------------|----------------------------------------------|-----------------------------------------------------------------------------------------------------------------------------------------------------|-------------------------------------------------------------------------------------|---------------|
| Electron transport                                  | Dr12134.3.S1_x_at | zgc:77225                                    | zgc:77225                                                                                                                                           | NADH dehydrogenase<br>activity<br>NADH dehydrogenase<br>(ubiquinone) activity       | Mitochondrion |
| Metabolic process                                   | Dr15313.1.A1_at   | zgc:85662                                    | zgc:85662                                                                                                                                           | Nucleotidyltransferase<br>activity                                                  |               |
| Metabolic process                                   | Dr20398.2.A1_at   | acsl1                                        | acyl-CoA synthetase long-chain family<br>member 1                                                                                                   | Catalytic activity                                                                  |               |
| Metabolic process                                   | Dr2430.1.S1_at    | aldh7a1                                      | aldehyde dehydrogenase 7 family,<br>member A1                                                                                                       | Oxidoreductase activity                                                             |               |
| Aldehyde metabolic<br>process<br>metabolic process  | Dr4751.1.S1_a_at  | aldh2<br>aldh2l<br>LOC100003829<br>LOC795450 | aldehyde dehydrogenase 2, like<br>aldehyde dehydrogenase 2 family<br>(mitochondrial)<br>Similar to mitochondrial aldehyde<br>dehydrogenase 2 family | 3-Chloroallyl aldehyde<br>dehydrogenase activity<br>oxidoreductase activity         |               |
| Biosynthetic process<br>NAD biosynthetic<br>process | Dr7457.1.A1_at    | nmnat2                                       | nicotinamide nucleotide<br>adenyltransferase 2                                                                                                      | Transferase activity<br>nucleotidyltransferase<br>activity                          |               |
| Metabolic process                                   | Dr7774.1.S1_at    | nat5                                         | N-acetyltransferase 5                                                                                                                               | N-Acetyltransferase<br>activity<br>acyltransferase activity<br>transferase activity |               |

**Unknown**

|  |                 |           |                              |                                            |  |
|--|-----------------|-----------|------------------------------|--------------------------------------------|--|
|  | Dr10524.1.S1_at | zgc:85694 | zgc:85694                    | Nucleotide binding<br>nucleic acid binding |  |
|  | Dr10561.1.A1_at |           |                              |                                            |  |
|  | Dr11083.1.S1_at | itm2b     | integral membrane protein 2B |                                            |  |

|                   |                                 |                                                                                        |                           |
|-------------------|---------------------------------|----------------------------------------------------------------------------------------|---------------------------|
| Dr1116.1.S1_at    | LOC100007066<br>si:dkey-78d16.1 | si:dkey-78d16.1<br>Hypothetical protein LOC100007066                                   | Calcium ion binding       |
| Dr11200.1.S1_at   | si:ch211-23714.6                | si:ch211-23714.6                                                                       |                           |
| Dr11208.1.A1_at   |                                 | Transcribed locus                                                                      |                           |
| Dr11248.1.A1_at   |                                 |                                                                                        |                           |
| Dr11640.1.S1_at   |                                 | Transcribed locus                                                                      |                           |
| Dr12482.2.A1_x_at |                                 | Transcribed locus                                                                      |                           |
| Dr12816.1.A1_at   |                                 | Transcribed locus                                                                      |                           |
| Dr13060.1.S1_at   | zgc:154072                      | zgc:154072                                                                             |                           |
| Dr13437.1.A1_at   |                                 | Transcribed locus                                                                      |                           |
| Dr13462.1.A1_at   |                                 | Transcribed locus                                                                      |                           |
| Dr13756.1.S1_at   |                                 | Transcribed locus                                                                      |                           |
| Dr13817.1.A1_at   | coro2b                          | Coronin, actin binding protein, 2B                                                     |                           |
| Dr13833.1.S1_at   | LOC572069                       | Hypothetical LOC572069                                                                 |                           |
| Dr13890.1.A1_at   |                                 | Transcribed locus                                                                      |                           |
| Dr14471.1.S1_at   | zgc:100838                      | zgc:100838                                                                             |                           |
| Dr15212.1.A1_at   | zgc:92140                       | zgc:92140                                                                              |                           |
| Dr15649.1.A1_at   | LOC798982                       | Similar to ROD1 protein                                                                |                           |
| Dr15655.1.S1_at   |                                 | Transcribed locus                                                                      |                           |
| Dr15990.1.S1_at   | LOC565937                       | Novel protein similar to vertebrate mitochondrial ribosomal protein S10 (MRSP10)       |                           |
| Dr16158.1.A1_at   |                                 | Transcribed locus                                                                      |                           |
| Dr16406.1.A1_at   | zgc:158299                      | Zgc:158299                                                                             |                           |
| Dr16557.1.S1_at   | LOC563634                       | Hypothetical LOC563634                                                                 |                           |
| Dr17497.2.S1_at   | zgc:110652                      | Zgc:110652                                                                             |                           |
| Dr17592.1.A1_at   | zgc:91819                       | zgc:91819                                                                              |                           |
| Dr17958.2.A1_at   | wu:fa04a07                      | Wu:fa04a07                                                                             |                           |
| Dr18110.1.A1_at   | LOC797948                       | Hypothetical protein LOC797948                                                         |                           |
| Dr18165.1.A1_at   |                                 |                                                                                        |                           |
| Dr18271.1.S1_at   |                                 |                                                                                        |                           |
| Dr18540.2.S1_a_at |                                 | Transcribed locus, weakly similar to XP_001344635.1 hypothetical protein [Danio rerio] |                           |
| Dr18540.3.A1_x_at | LOC799545                       | Hypothetical protein LOC799545                                                         |                           |
| Dr18766.1.A1_at   |                                 |                                                                                        |                           |
| Dr19097.1.A1_at   | wu:fc57b04                      | wu:fc57b04                                                                             |                           |
| Dr19215.1.S1_at   | zgc:136828                      | zgc:136828                                                                             | Sulfotransferase activity |
| Dr19228.1.A1_at   |                                 |                                                                                        |                           |
| Dr19364.1.S1_at   | wu:fb96d05                      | wu:fb96d05                                                                             |                           |
| Dr19468.1.A1_at   | zgc:66100                       | Similar to AMMECR1                                                                     |                           |
| Dr20716.1.A1_at   | tpm1                            | tropomyosin 1 (alpha)                                                                  |                           |
| Dr22471.1.A1_at   | wu:fe38h02                      | wu:fe38h02                                                                             |                           |
| Dr22737.1.A1_at   | wu:fj47c02                      | wu:fj47c02                                                                             |                           |
| Dr22745.1.A1_at   | LOC100002604                    | Similar to Phosphodiesterase 5A                                                        |                           |
| Dr22801.1.A1_at   | LOC567798                       | Similar to amylo-1, 6-glucosidase/4-alpha-glucancotransferase                          |                           |

|                  |                                           |                                                                                                           |                                            |               |
|------------------|-------------------------------------------|-----------------------------------------------------------------------------------------------------------|--------------------------------------------|---------------|
| Dr23372.1.A1_at  |                                           | Transcribed locus                                                                                         |                                            |               |
| Dr23758.1.A1_at  | wu:fa16a02                                | wu:fa16a02                                                                                                |                                            |               |
| Dr24399.1.A1_at  | zgc:55548                                 | Zgc:55548                                                                                                 |                                            |               |
| Dr24527.1.S1_at  |                                           |                                                                                                           |                                            |               |
| Dr24664.1.S1_at  |                                           | Transcribed locus                                                                                         |                                            |               |
| Dr25022.1.A1_at  | LOC792040                                 | Hypothetical protein LOC792040                                                                            |                                            |               |
| Dr25444.1.A1_at  |                                           | Transcribed locus                                                                                         |                                            |               |
| Dr25559.1.S1_at  | sb:cb166                                  | sb:cb166                                                                                                  |                                            |               |
| Dr25648.1.S1_at  |                                           |                                                                                                           |                                            |               |
| Dr25880.1.A1_at  |                                           | Transcribed locus                                                                                         |                                            |               |
| Dr26095.1.A1_at  |                                           | Transcribed locus                                                                                         |                                            |               |
| Dr26303.1.A1_at  | LOC100000869<br>LOC563456                 | Hypothetical LOC563456<br>Hypothetical protein LOC100000869                                               |                                            |               |
| Dr3198.1.S1_at   | zgc:55768                                 | zgc:55768                                                                                                 | GTP binding                                | Intracellular |
| Dr3258.1.A1_at   | wu:fc15h07                                | wu:fc15h07                                                                                                |                                            |               |
| Dr374.1.S1_at    | irf2bp2                                   | interferon regulatory factor 2 binding protein 2                                                          |                                            |               |
| Dr4033.1.A1_at   | wu:fb72g11                                | wu:fb72g11                                                                                                |                                            |               |
| Dr4676.1.A1_at   |                                           | Transcribed locus                                                                                         |                                            |               |
| Dr4736.1.A1_at   | LOC563405                                 | Hypothetical LOC563405                                                                                    |                                            |               |
| Dr5133.1.S1_at   | LOC569053                                 | Hypothetical LOC569053                                                                                    |                                            |               |
| Dr5162.1.A1_at   | wu:fc17d03                                | wu:fc17d03                                                                                                |                                            |               |
| Dr5293.1.S1_at   | hn1<br>LOC798010<br>LOC798208             | hematological and neurological expressed 1-like<br>similar to HN1-like protein                            |                                            |               |
| Dr5583.1.A1_at   | LOC797252                                 | Hypothetical protein LOC797252                                                                            |                                            |               |
| Dr5663.1.S1_at   |                                           | Transcribed locus, strongly similar to XP_706968.1 hypothetical protein XP_701876 isoform 2 [Danio rerio] |                                            |               |
| Dr5685.1.S1_at   |                                           |                                                                                                           |                                            |               |
| Dr6037.1.A1_at   | zgc:91993                                 | zgc:91993                                                                                                 | Phospholipid binding                       |               |
| Dr6517.2.S1_at   | LOC796564                                 | Hypothetical protein LOC796564                                                                            |                                            |               |
| Dr6752.1.A1_at   |                                           |                                                                                                           |                                            |               |
| Dr6837.1.S1_at   | znf259                                    | zinc finger protein 259                                                                                   | Protein binding<br>zinc ion binding        |               |
| Dr7708.1.S1_at   | lsm12                                     | LSM12 homolog (S. cerevisiae)                                                                             |                                            |               |
| Dr891.1.S1_at    | LOC797006                                 | Hypothetical protein LOC797006                                                                            |                                            |               |
| Dr9070.1.A1_at   | zgc:63770                                 | zgc:63770                                                                                                 | Nucleotide binding<br>nucleic acid binding |               |
| Dr9329.1.S1_at   | LOC561168                                 | Hypothetical LOC561168                                                                                    |                                            |               |
| Dr9411.1.A1_a_at | zgc:158179                                | zgc:158179                                                                                                |                                            |               |
| Dr9560.1.A1_at   | LOC565706                                 | Similar to cyclic AMP specific phosphodiesterase                                                          |                                            |               |
| Dr97.1.A1_at     | LOC100006553<br>LOC100006779<br>LOC571509 | Hypothetical LOC571509<br>hypothetical protein LOC100006553<br>hypothetical protein LOC100006779          |                                            |               |
| Dr9711.2.A1_at   | zgc:112466                                | zgc:112466                                                                                                |                                            |               |
| Dr9746.7.A1_at   | LOC560240                                 | Hypothetical LOC560240                                                                                    |                                            |               |
| Dr9888.1.A1_at   |                                           |                                                                                                           |                                            |               |



Dr9954.1.A1\_at      MGC162178      Hypothetical LOC564953

Gene names and roles are as assigned on the Affymetrix web site (<http://www.affymetrix.com/analysis/index.affx>).
