# Supplementary material for: Gene expression changes in a zebrafish model of drug dependency suggest conservation of neuro-adaptation pathways
Source: Oxford University Press journal article supplement (doi:10.1242/jeb.014399), 2008-05-04
Supplement: jeb014399supptables2.pdf [file jeb014399supptables2.pdf]

Table S2. Genes showing twofold changes in expression in both ethanol-treated and nicotine-treated animals compared with control animals grouped according to biological process

| Biological process                                                                                                                                           | Probe set ID    | Gene symbol                                                         | Gene title                                                                | Molecular function term                                                                                                                                                                                                                                                                                     | Cellular component term                                      |
|--------------------------------------------------------------------------------------------------------------------------------------------------------------|-----------------|---------------------------------------------------------------------|---------------------------------------------------------------------------|-------------------------------------------------------------------------------------------------------------------------------------------------------------------------------------------------------------------------------------------------------------------------------------------------------------|--------------------------------------------------------------|
| <b>Protein modification/<br/>ubiquitination</b>                                                                                                              |                 |                                                                     |                                                                           |                                                                                                                                                                                                                                                                                                             |                                                              |
| Protein amino acid glycosylation<br>metabolic process                                                                                                        | Dr10492.2.A1_at | st8sia1                                                             | ST8 alpha-N-acetylneuraminide alpha-2,8-sialyltransferase 1               | Alpha-N-acetylneuraminase<br>alpha-2,8-sialyltransferase activity<br>alpha-N-acetylneuraminase<br>alpha-2,8-sialyltransferase activity<br>sialyltransferase activity<br>transferase activity<br>transferase activity, transferring glycosyl groups                                                          | Integral to Golgi membrane                                   |
| Protein complex assembly<br>intracellular protein transport<br>ER to Golgi vesicle-mediated transport<br>vesicle-mediated transport<br>notochord development | Dr14687.1.A1_at | LOC799705                                                           | Similar to coatomer protein complex subunit beta 2                        | Protein binding<br>protein transporter activity                                                                                                                                                                                                                                                             | Nucleus<br>endoplasmic reticulum<br>Golgi-associated vesicle |
|                                                                                                                                                              | Dr8505.1.S1_at  | ahsg                                                                | alpha-2-HS-glycoprotein                                                   | Cysteine protease inhibitor activity                                                                                                                                                                                                                                                                        |                                                              |
| Protein complex assembly<br>transport<br>intracellular protein transport<br>vesicle-mediated transport                                                       | Dr682.1.S1_a_at | ap2m1                                                               | adaptor-related protein complex 2, mu 1 subunit                           | Protein binding                                                                                                                                                                                                                                                                                             | Clathrin vesicle coat                                        |
| <b>Transcription/<br/>translation</b>                                                                                                                        |                 |                                                                     |                                                                           |                                                                                                                                                                                                                                                                                                             |                                                              |
| Transcription<br>transcription termination<br>regulation of transcription, DNA-dependent<br>transcription anti-termination                                   | Dr1403.1.S1_at  | mef2d                                                               | myocyte enhancer factor 2d                                                | DNA binding<br>transcription factor activity<br>sequence-specific DNA binding                                                                                                                                                                                                                               | Nucleus                                                      |
| Regulation of transcription, DNA-dependent                                                                                                                   | Dr16418.1.A1_at | LOC793651                                                           | Hypothetical protein LOC793651                                            | Transcription factor activity<br>zinc ion binding<br>sequence-specific DNA binding                                                                                                                                                                                                                          | Intracellular nucleus                                        |
| Transcription<br>transcription termination<br>regulation of transcription, DNA-dependent<br>transcription antitermination                                    | Dr224.1.S1_at   | tbx6                                                                | T-box gene 6                                                              | DNA binding<br>transcription factor activity                                                                                                                                                                                                                                                                | Nucleus                                                      |
| Transcription<br>RNA elongation<br>regulation of transcription, DNA-dependent<br>regulation of transcription                                                 | Dr25167.1.S1_at | elavl3                                                              | ELAV (embryonic lethal, abnormal vision, Drosophila)-like 3 (Hu antigen C | Nucleotide binding<br>nucleic acid binding<br>DNA binding<br>RNA polymerase II transcription factor activity<br>RNA binding<br>DNA-directed RNA polymerase activity<br>zinc ion binding<br>transferase activity<br>nucleotidyltransferase activity<br>transcription regulator activity<br>metal ion binding | Ribonucleoprotein complex                                    |
| rRNA processing<br>proteolysis<br>secretory pathway                                                                                                          | Dr25683.1.S1_at | ctsl1b<br>LOC100001493<br>LOC100001565<br>LOC100001785<br>LOC563390 | cathepsin L, 1 b similar to cathepsin L                                   | Cysteine-type endopeptidase activity<br>endopeptidase inhibitor activity<br>peptidase activity<br>cysteine-type peptidase activity<br>hydrolase activity                                                                                                                                                    | Extracellular region                                         |

|                                                                                                                                                   |                   |                                                                            |                                                                         |                                                                                                                              |                                        |  |
|---------------------------------------------------------------------------------------------------------------------------------------------------|-------------------|----------------------------------------------------------------------------|-------------------------------------------------------------------------|------------------------------------------------------------------------------------------------------------------------------|----------------------------------------|--|
|                                                                                                                                                   |                   | LOC564835<br>LOC564906<br>LOC564979<br>LOC567623<br>LOC569326<br>LOC798200 |                                                                         |                                                                                                                              |                                        |  |
| DNA replication<br>DNA repair                                                                                                                     | Dr6031.1.A1_at    | poll                                                                       | polymerase (DNA directed), lambda                                       | DNA binding<br>DNA-directed DNA polymerase activity<br>beta DNA polymerase activity<br>sequence-specific DNA binding         | Intracellular                          |  |
| Regulation of transcription, DNA-dependent                                                                                                        | DrAffx.1.14.S1_at | cbfb                                                                       | core-binding factor, beta subunit                                       | DNA binding<br>transcription coactivator activity<br>transcription regulator activity<br>protein heterodimerization activity | Nucleus<br>core-binding factor complex |  |
| <b>Neurotransmission/<br/>synaptic plasticity</b>                                                                                                 |                   |                                                                            |                                                                         |                                                                                                                              |                                        |  |
| Protein amino acid phosphorylation<br>cell adhesion<br>multicellular organismal development<br>nervous system development<br>cell differentiation | Dr12598.1.S1_at   | ncam2                                                                      | neural cell adhesion molecule 2                                         | Vascular endothelial growth factor receptor activity<br>protein binding<br>ATP binding                                       | Membrane attack complex<br>membrane    |  |
| Calcium ion transport<br>homophilic cell adhesion                                                                                                 | Dr21026.1.S1_at   | pcdh10a                                                                    | protocadherin 10a                                                       | Calcium channel activity<br>calcium ion binding<br>calcium channel inhibitor activity                                        | Membrane                               |  |
| Zinc ion transport<br>Notch signaling pathway                                                                                                     | Dr16536.1.A1_s_at | rnf146                                                                     | ring finger protein 146                                                 | Protein binding<br>zinc ion binding<br>metal ion binding                                                                     |                                        |  |
|                                                                                                                                                   | Dr25300.1.A1_at   | LOC556178                                                                  | similar to neurocalcin                                                  |                                                                                                                              |                                        |  |
|                                                                                                                                                   | Dr4748.1.S1_at    | LOC553977                                                                  | granulin 1                                                              |                                                                                                                              |                                        |  |
| Transport<br>cell cycle<br>mitosis<br>multicellular organismal development<br>nervous system development<br>cell differentiation<br>cell division | Dr6616.1.S1_at    | pafah1b1                                                                   | platelet-activating factor acetylhydrolase, isoform lb, alpha subunit b |                                                                                                                              | Cytoskeleton<br>microtubule            |  |
| <b>Synaptic plasticity/<br/>structural</b>                                                                                                        |                   |                                                                            |                                                                         |                                                                                                                              |                                        |  |
|                                                                                                                                                   | Dr12425.1.S1_at   | zgc:92533                                                                  | zgc:92533                                                               | Structural molecule activity                                                                                                 | Intermediate filament                  |  |
|                                                                                                                                                   | Dr12425.1.S1_x_at | zgc:92533                                                                  | zgc:92533                                                               | Structural molecule activity                                                                                                 | Intermediate filament                  |  |
|                                                                                                                                                   | Dr12425.1.S1_at   | zgc:92533                                                                  | zgc:92533                                                               | Structural molecule activity                                                                                                 | Intermediate filament                  |  |
|                                                                                                                                                   | Dr12425.1.S1_x_at | zgc:92533                                                                  | zgc:92533                                                               | Structural molecule activity                                                                                                 | Intermediate filament                  |  |
|                                                                                                                                                   | Dr1434.1.S1_at    | krt5                                                                       | keratin 5                                                               | Structural molecule activity                                                                                                 | Intermediate filament                  |  |
| Cell adhesion                                                                                                                                     | Dr15229.1.A1_at   | si:rp71-1h10.1                                                             | Si:rp71-1h10.1                                                          | Structural molecule activity                                                                                                 | Actin cytoskeleton                     |  |
| Cell adhesion<br>central nervous system development<br>positive regulation of axon extension                                                      | Dr8147.1.S1_at    | cntn2                                                                      | contactin 2                                                             | Protein binding                                                                                                              | Membrane attack complex<br>membrane    |  |
| Calcium-independent cell-cell adhesion                                                                                                            | Dr8153.1.S5_a_at  | cldng                                                                      | claudin g                                                               | Structural molecule activity<br>protein binding                                                                              | Membrane attack complex                |  |

identical protein binding  
tight junction  
tight junction  
membrane  
integral to  
membrane

Dr20279.1.A1\_at ncanl neurocan, like

### Signal transduction

Dr22745.1.A1\_at LOC100002604 Similar to phosphodiesterase 5A

Protein amino acid phosphorylation Dr7083.1.S1\_at ptk2.1 protein tyrosine kinase 2.1 Protein kinase activity protein-tyrosine kinase activity ATP binding kinase activity Cytoskeleton

Signal transduction axon guidance DrAffx.1.4.S1\_at tnr tenascin R (restrictin, janusin) Receptor binding

### Cell cycle/ apoptosis

Regulation of progression through cell cycle transcription transcription termination regulation of transcription, DNA-dependent transcription antitermination Dr18139.1.S1\_at tfdp1 transcription factor Dp-1, like DNA binding transcription factor activity Nucleus transcription factor complex

### Steroid metabolism/transport

Dr20778.1.S1\_at zgc:103456 zgc:103456. similar to peripheral benzodiazepine receptor Integral to membrane

### Ion/protein transport

Transport Dr14053.1.A1\_at synpr synaptoporin Transporter activity porin activity Synaptic vesicle membrane integral to membrane outer membrane

Anion transport Dr17310.1.S1\_at zgc:56235 zgc:56235 Voltage-gated ion-selective channel activity Mitochondrial outer membrane

Calcium ion transport Dr19079.1.S1\_at zgc:92169 zgc:92169 CalcineurinB Calcium channel activity calcium ion binding calcium channel inhibitor activity

Dr19445.1.S1\_at LOC100004680 Similar to potassium channel TSK3

Dr3199.1.A1\_at LOC556181 Similar to solute carrier family 1 (glial high affinity glutamate transporter), member 3

**Metabolism**

|                                                                                                                                                       |                   |                 |                                                                  |                                                                                                                   |                          |
|-------------------------------------------------------------------------------------------------------------------------------------------------------|-------------------|-----------------|------------------------------------------------------------------|-------------------------------------------------------------------------------------------------------------------|--------------------------|
| Electron transport                                                                                                                                    | Dr12134.3.S1_x_at | zgc:77225       | zgc:77225                                                        | NADH dehydrogenase activity<br>NADH dehydrogenase<br>(ubiquinone) activity                                        | Mitochondrion            |
| Nucleobase, nucleoside, nucleotide<br>and nucleic acid metabolic process                                                                              | Dr3216.1.A1_at    | LOC791647<br>np | nucleoside<br>phosphorylase<br>hypothetical protein<br>LOC791647 | Purine-nucleoside phosphorylase<br>activity<br>transferase activity, transferring<br>pentosyl groups              |                          |
| Biosynthetic process                                                                                                                                  | Dr17697.1.A1_at   | LOC792234       | hypothetical protein<br>LOC792234                                | Catalytic activity<br>uridine kinase activity<br>ATP binding<br>nucleotidyltransferase activity                   |                          |
| Protein complex assembly<br>transport<br>intracellular protein transport<br>vesicle-mediated transport                                                | Dr682.1.S1_a_at   | ap2m1           | adaptor-related<br>protein complex 2,<br>mu 1 subunit            | Protein binding                                                                                                   | Clathrin vesicle<br>coat |
| Protein catabolic process                                                                                                                             | Dr6105.1.A1_at    | LOC553461       | hypothetical protein<br>LOC553461                                | Protein binding                                                                                                   |                          |
| Response to hypoxia<br>heme biosynthetic process<br>transport<br>iron ion transport<br>iron ion homeostasis<br>response to stress<br>oxygen transport | Dr636.1.S1_at     | mb              | myoglobin                                                        | Oxygen transporter activity<br>binding<br>iron ion binding<br>oxygen binding<br>heme binding<br>metal ion binding |                          |

**Other**

|                    |                   |            |                                                                         |                                                                            |               |
|--------------------|-------------------|------------|-------------------------------------------------------------------------|----------------------------------------------------------------------------|---------------|
|                    | Dr10524.1.S1_at   | zgc:85694  | zgc:85694                                                               | Nucleotide binding<br>nucleic acid binding                                 |               |
|                    | Dr11083.1.S1_at   | itm2b      | integral membrane<br>protein 2B                                         |                                                                            |               |
|                    | Dr11120.1.A1_at   | wu:fc18e04 | wu:fc18e04                                                              |                                                                            |               |
|                    | Dr11372.1.A1_at   | LOC565404  | Similar to RNA<br>binding motif protein<br>10 like (57.9 kD)<br>(4N366) | Nucleic acid binding<br>zinc ion binding                                   | Intracellular |
|                    | Dr11640.1.S1_at   |            | Transcribed locus                                                       |                                                                            |               |
|                    | Dr11818.1.A1_at   | LOC557995  | Similar to ring-IBR-<br>ring domain<br>containing protein<br>Dorfin     |                                                                            |               |
| Electron transport | Dr12134.3.S1_x_at | zgc:77225  | zgc:77225                                                               | NADH dehydrogenase activity<br>NADH dehydrogenase<br>(ubiquinone) activity | Mitochondrion |
|                    | Dr12215.1.A1_at   |            | Transcribed locus                                                       |                                                                            |               |
|                    | Dr12703.1.A1_at   | LOC798401  | Hypothetical protein<br>LOC798401                                       |                                                                            |               |
|                    | Dr12816.1.A1_at   |            | Transcribed locus                                                       |                                                                            |               |
|                    | Dr12849.2.A1_a    |            |                                                                         |                                                                            |               |
|                    | Dr12857.1.A1_at   | skia       | nuclear oncoprotein<br>skia                                             | DNA binding                                                                | Nucleus       |
|                    | Dr13121.1.A1_x_at | LOC792809  | Hypothetical protein<br>LOC792809                                       |                                                                            |               |
|                    | Dr13121.2.A1_at   | LOC795574  | Hypothetical protein<br>LOC795574                                       |                                                                            |               |
|                    | Dr13121.2.A1_x_at | LOC795574  | Hypothetical protein<br>LOC795574                                       |                                                                            |               |
|                    | Dr13557.2.S1_at   | zgc:73265  | zgc:73265                                                               |                                                                            |               |

|                                                                                                                                                              |                   |                   |                                                                                        |                                                 |                                                              |
|--------------------------------------------------------------------------------------------------------------------------------------------------------------|-------------------|-------------------|----------------------------------------------------------------------------------------|-------------------------------------------------|--------------------------------------------------------------|
|                                                                                                                                                              | Dr13756.1.S1_at   |                   | Transcribed locus                                                                      |                                                 |                                                              |
|                                                                                                                                                              | Dr13817.1.A1_at   | coro2b            | coronin, actin binding protein, 2B                                                     |                                                 |                                                              |
|                                                                                                                                                              | Dr13833.1.S1_at   | LOC572069         | Hypothetical LOC572069                                                                 |                                                 |                                                              |
|                                                                                                                                                              | Dr14343.1.A1_at   |                   | Transcribed locus                                                                      |                                                 |                                                              |
|                                                                                                                                                              | Dr14555.1.S1_at   | ivns1abp          | influenza virus NS1A binding protein a                                                 | Protein binding                                 | Nucleus                                                      |
| Protein complex assembly<br>intracellular protein transport<br>ER to Golgi vesicle-mediated transport<br>vesicle-mediated transport<br>notochord development | Dr14687.1.A1_at   | LOC799705         | Similar to coatomer protein complex subunit beta 2                                     | Protein binding<br>protein transporter activity | Nucleus<br>endoplasmic reticulum<br>Golgi-associated vesicle |
|                                                                                                                                                              | Dr14868.1.S1_at   | zgc:103699        | zgc:103699                                                                             | Protein binding                                 |                                                              |
|                                                                                                                                                              | Dr14930.1.A1_at   |                   | Transcribed locus                                                                      |                                                 |                                                              |
|                                                                                                                                                              | Dr15174.1.A1_at   | LOC563993         | Similar to MGC80777 protein                                                            |                                                 |                                                              |
|                                                                                                                                                              | Dr12482.2.A1_x_at |                   | Transcribed locus                                                                      |                                                 |                                                              |
|                                                                                                                                                              | Dr11818.1.A1_at   | LOC557995         | Similar to ring-IBR-ring domain containing protein Dorfin                              |                                                 |                                                              |
|                                                                                                                                                              | Dr12857.1.A1_at   | skia              | nuclear oncoprotein skia                                                               | DNA binding                                     | Nucleus                                                      |
|                                                                                                                                                              | Dr15366.1.S1_at   | LOC795907         | Similar to leucine-rich alpha-2-glycoprotein                                           |                                                 |                                                              |
|                                                                                                                                                              | Dr11372.1.A1_at   | LOC565404         | Similar to RNA binding motif protein 10 like (57.9 kD) (4N366)                         | Nucleic acid binding<br>zinc ion binding        | Intracellular                                                |
|                                                                                                                                                              | Dr15366.1.S1_at   | LOC795907         | Similar to leucine-rich alpha-2-glycoprotein                                           |                                                 |                                                              |
|                                                                                                                                                              | Dr16049.1.S1_at   |                   | Transcribed locus                                                                      |                                                 |                                                              |
|                                                                                                                                                              | Dr16158.1.A1_at   |                   | Transcribed locus                                                                      |                                                 |                                                              |
|                                                                                                                                                              | Dr16231.1.A1_at   |                   | Transcribed locus                                                                      |                                                 |                                                              |
|                                                                                                                                                              | Dr16344.1.A1_at   |                   | Transcribed locus                                                                      |                                                 |                                                              |
|                                                                                                                                                              | Dr16385.1.A1_at   | si:ch211-284a13.1 | si:ch211-284a13.1                                                                      |                                                 |                                                              |
|                                                                                                                                                              | Dr16470.1.A1_at   |                   | Transcribed locus                                                                      |                                                 |                                                              |
|                                                                                                                                                              | Dr17764.1.A1_at   |                   | Transcribed locus                                                                      |                                                 |                                                              |
|                                                                                                                                                              | Dr1782.1.A1_at    | wu:fc52a02        | wu:fc52a02                                                                             |                                                 |                                                              |
|                                                                                                                                                              | Dr18215.1.A1_at   | LOC796766         | Similar to novel lectin C-type domain containing protein                               |                                                 |                                                              |
|                                                                                                                                                              | Dr18513.2.S1_a_at | sccpdhb           | saccharopine dehydrogenase b                                                           |                                                 |                                                              |
|                                                                                                                                                              | Dr18540.2.S1_a_at |                   | Transcribed locus, weakly similar to XP_001344635.1 hypothetical protein [Danio rerio] |                                                 |                                                              |
|                                                                                                                                                              | Dr18540.3.A1_at   | LOC799545         | Hypothetical protein LOC799545                                                         |                                                 |                                                              |

|                                                                          |                   |                               |                                                                                                 |                                                                                                      |
|--------------------------------------------------------------------------|-------------------|-------------------------------|-------------------------------------------------------------------------------------------------|------------------------------------------------------------------------------------------------------|
|                                                                          | Dr18540.3.A1_x_at | LOC799545                     | Hypothetical protein<br>LOC799545                                                               |                                                                                                      |
|                                                                          | Dr18603.1.A1_at   | LOC794701                     | Hypothetical protein<br>LOC794701                                                               |                                                                                                      |
|                                                                          | Dr18643.1.A1_at   |                               | Transcribed locus                                                                               |                                                                                                      |
|                                                                          | Dr18793.1.A1_at   | LOC1000056<br>20              | Hypothetical protein<br>LOC100005620                                                            |                                                                                                      |
|                                                                          | Dr19364.1.S1_at   | wu:fb96d05                    | wu:fb96d05                                                                                      |                                                                                                      |
|                                                                          | Dr19468.1.A1_at   | zgc:66100                     | zgc:66100                                                                                       |                                                                                                      |
|                                                                          | Dr19567.1.S1_at   | LOC791936<br>zgc:73377        | zgc:73377<br>Hypothetical protein<br>LOC791936                                                  |                                                                                                      |
|                                                                          | Dr19928.1.A1_at   | LOC555906                     | Hypothetical<br>LOC555906                                                                       |                                                                                                      |
|                                                                          | Dr20778.1.S1_at   | zgc:103456                    | zgc:103456                                                                                      | Integral to<br>membrane                                                                              |
|                                                                          | Dr22059.2.A1_at   | LOC559629                     | Hypothetical<br>LOC559629                                                                       |                                                                                                      |
|                                                                          | Dr22276.1.S1_at   |                               |                                                                                                 |                                                                                                      |
|                                                                          | Dr22471.1.A1_at   | wu:fe38h02                    | wu:fe38h02                                                                                      |                                                                                                      |
| Immune response<br>antigen processing and presentation                   | Dr23469.1.S1_s_at | a2<br>zgc:113912<br>zgc:92049 | MHC class II<br>integral membrane<br>protein alpha chain<br>2<br>zgc:92049<br>zgc:113912        | Membrane                                                                                             |
| Immune response<br>antigen processing and presentation                   | Dr23469.1.S1_x_at | zgc:92049                     | zgc:92049                                                                                       | Membrane                                                                                             |
|                                                                          | Dr23514.1.A1_at   | wu:fa94e11                    | wu:fa94e11                                                                                      |                                                                                                      |
|                                                                          | Dr24135.1.A1_at   | zgc:110084                    | zgc:110084                                                                                      | Nucleotide binding<br>nucleic acid binding                                                           |
|                                                                          | Dr24664.1.S1_at   |                               | Transcribed locus                                                                               |                                                                                                      |
|                                                                          | Dr25559.1.S1_at   | sb:cb166                      | sb:cb166                                                                                        |                                                                                                      |
|                                                                          | Dr25630.1.S1_at   |                               |                                                                                                 |                                                                                                      |
| Nucleobase, nucleoside, nucleotide<br>and nucleic acid metabolic process | Dr3216.1.A1_at    | LOC791647<br>np               | nucleoside<br>phosphorylase<br>hypothetical protein<br>LOC791647                                | Purine-nucleoside phosphorylase<br>activity<br>transferase activity, transferring<br>pentosyl groups |
|                                                                          | Dr3664.2.A1_at    | LOC792181                     | Hypothetical protein<br>LOC792181                                                               |                                                                                                      |
|                                                                          | Dr4033.1.A1_at    | wu:fb72g11                    | wu:fb72g11                                                                                      |                                                                                                      |
|                                                                          | Dr4213.1.S1_at    | zgc:111986                    | zgc:111986                                                                                      |                                                                                                      |
|                                                                          | Dr4310.1.S1_at    |                               | Transcribed locus,<br>weakly similar to<br>NP_001032317.1<br>protein LOC568735<br>[Danio rerio] |                                                                                                      |
|                                                                          | Dr4543.1.S1_at    | LOC572703                     | Similar to fibulin-4                                                                            |                                                                                                      |
|                                                                          | Dr4615.1.S1_a_at  | wu:fc70h04                    | wu:fc70h04                                                                                      |                                                                                                      |
|                                                                          | Dr4878.1.S1_at    | LOC558130                     | Hypothetical<br>LOC558130                                                                       |                                                                                                      |
|                                                                          | Dr4996.1.A1_at    | wu:fb92f01                    | wu:fb92f01                                                                                      |                                                                                                      |
|                                                                          | Dr52.1.A1_at      |                               |                                                                                                 |                                                                                                      |
|                                                                          | Dr5663.1.S1_at    |                               | Transcribed locus,<br>strongly similar to<br>XP_706968.1                                        |                                                                                                      |

|                                                 |                 |                         |                                                 |                                                                                                                         |  |               |
|-------------------------------------------------|-----------------|-------------------------|-------------------------------------------------|-------------------------------------------------------------------------------------------------------------------------|--|---------------|
|                                                 |                 |                         |                                                 | hypothetical protein<br>XP_701876 isoform<br>2 [Danio rerio]                                                            |  |               |
|                                                 | Dr5685.1.S1_at  |                         |                                                 |                                                                                                                         |  |               |
|                                                 | Dr5687.1.A1_at  |                         |                                                 | Transcribed locus                                                                                                       |  |               |
| DNA metabolic process<br>DNA topological change | Dr5696.1.S1_at  | prc1                    | Protein regulator of<br>cytokinesis 1           | DNA binding<br>DNA topoisomerase (ATP-<br>hydrolyzing) activity<br>ATP binding                                          |  | Chromosome    |
| DNA replication<br>DNA repair                   | Dr6031.1.A1_at  | poll                    | Polymerase (DNA<br>directed), lambda            | DNA binding<br>DNA-directed DNA polymerase<br>activity<br>beta DNA polymerase activity<br>sequence-specific DNA binding |  | Intracellular |
|                                                 | Dr6287.1.A1_at  | wu:fd57b02              | wu:fd57b02                                      |                                                                                                                         |  |               |
|                                                 | Dr6844.1.A1_at  | LOC559772               | Hypothetical<br>LOC559772                       |                                                                                                                         |  |               |
|                                                 | Dr75.1.A1_at    | LOC1000051<br>44        | Similar to<br>fucokinase                        |                                                                                                                         |  |               |
|                                                 | Dr796.1.S1_at   | sb:cb492                | sb:cb492                                        |                                                                                                                         |  |               |
|                                                 | Dr796.1.S1_x_at | sb:cb492                | sb:cb492                                        |                                                                                                                         |  |               |
|                                                 | Dr839.2.S1_a_at |                         |                                                 |                                                                                                                         |  |               |
|                                                 | Dr9263.1.A1_at  | wu:fk68g08              | wu:fk68g08                                      |                                                                                                                         |  |               |
|                                                 | Dr9343.2.S1_at  | LOC798138<br>zgc:153878 | zgc:153878<br>hypothetical protein<br>LOC798138 | Binding                                                                                                                 |  |               |
|                                                 | Dr9699.2.A1_at  | LOC561612               | Hypothetical<br>LOC561612                       |                                                                                                                         |  |               |

Gene names and roles are as assigned on the Affymetrix web site (<http://www.affymetrix.com/analysis/index.affx>).
